# Supplementary material for: The impact of the introduction of critical care outreach services in England: a multicentre interrupted time-series analysis
Source: PubMed Central journal article supplement (PMC2556766; doi:10.1186/cc6163), 2007-09-18
Supplement: cc6163-S1.pdf [file cc6163-S1.pdf]

**Table S1 Effects of formal start of critical care outreach services (CCOS) on outcomes**

| Primary exposure variable                                | Effect estimate (95% CI)<br>compared with no CCOS | P-value            |
|----------------------------------------------------------|---------------------------------------------------|--------------------|
| <i>Model1a, Admission from ward</i>                      | <i>Odds ratio</i>                                 | 0.687 <sup>a</sup> |
| CCOS month 1                                             | 1.03 (0.89, 1.19)                                 | 0.682              |
| CCOS month 2                                             | 0.97 (0.83, 1.12)                                 | 0.641              |
| CCOS month 3 and following                               | 0.94 (0.84, 1.06)                                 | 0.316              |
| <i>Model2a, CPR 24 hours prior to admission</i>          | <i>Odds ratio</i>                                 | 0.049 <sup>a</sup> |
| CCOS month 1                                             | 0.95 (0.67, 1.35)                                 | 0.787              |
| CCOS month 2                                             | 0.75 (0.51, 1.10)                                 | 0.142              |
| CCOS month 3 and following                               | 0.84 (0.73, 0.96)                                 | 0.012              |
| <i>Model2b, Admission out-of-hours</i>                   | <i>Odds ratio</i>                                 | 0.039 <sup>a</sup> |
| CCOS month 1                                             | 1.00 (0.81, 1.24)                                 | 0.996              |
| CCOS month 2                                             | 0.95 (0.81, 1.12)                                 | 0.534              |
| CCOS month 3 and following                               | 0.91 (0.84, 0.97)                                 | 0.005              |
| <i>Model2c, ICNARC physiology score</i>                  | <i>Change in mean</i>                             | 0.049 <sup>a</sup> |
| CCOS month 1                                             | -1.15 (-2.57, 0.26)                               | 0.109              |
| CCOS month 2                                             | -1.35 (-3.04, 0.34)                               | 0.118              |
| CCOS month 3 and following                               | -1.22 (-2.12, -0.31)                              | 0.008              |
| <i>Model2c, ICNARC physiology score</i>                  | <i>Change in SD</i>                               | 0.870 <sup>a</sup> |
| CCOS month 1                                             | 0.023 (-0.056, 0.102)                             | 0.568              |
| CCOS month 2                                             | 0.001 (-0.130, 0.132)                             | 0.988              |
| CCOS month 3 and following                               | -0.010 (-0.050, 0.030)                            | 0.638              |
| <i>Model2d, Active treatment withdrawn</i>               | <i>Odds ratio</i>                                 | 0.739 <sup>a</sup> |
| CCOS month 1                                             | 1.12 (0.84, 1.48)                                 | 0.440              |
| CCOS month 2                                             | 0.91 (0.68, 1.21)                                 | 0.510              |
| CCOS month 3 and following                               | 1.00 (0.82, 1.21)                                 | 0.992              |
| <i>Model2e, Mortality in ICU</i>                         | <i>Odds ratio</i>                                 | 0.757 <sup>a</sup> |
| CCOS month 1                                             | 1.00 (0.81, 1.24)                                 | 0.993              |
| CCOS month 2                                             | 1.06 (0.89, 1.25)                                 | 0.537              |
| CCOS month 3 and following                               | 0.97 (0.87, 1.08)                                 | 0.628              |
| <i>Model3a, Discharge out-of-hours</i>                   | <i>Odds ratio</i>                                 | 0.003 <sup>a</sup> |
| CCOS month 1                                             | 1.57 (1.19, 2.07)                                 | 0.001              |
| CCOS month 2                                             | 1.01 (0.69, 1.46)                                 | 0.977              |
| CCOS month 3 and following                               | 1.08 (0.89, 1.31)                                 | 0.453              |
| <i>Model3b, Early discharge due to shortage of beds</i>  | <i>Odds ratio</i>                                 | 0.310 <sup>a</sup> |
| CCOS month 1                                             | 1.30 (0.84, 2.01)                                 | 0.242              |
| CCOS month 2                                             | 1.08 (0.72, 1.61)                                 | 0.708              |
| CCOS month 3 and following                               | 0.86 (0.64, 1.15)                                 | 0.304              |
| <i>Model3c, Hospital mortality</i>                       | <i>Odds ratio</i>                                 | 0.069 <sup>a</sup> |
| CCOS month 1                                             | 1.28 (1.05, 1.57)                                 | 0.016              |
| CCOS month 2                                             | 0.94 (0.76, 1.17)                                 | 0.578              |
| CCOS month 3 and following                               | 1.05 (0.96, 1.15)                                 | 0.277              |
| <i>Model3d, Readmission within 48 hours of discharge</i> | <i>Odds ratio</i>                                 | 0.944 <sup>a</sup> |
| CCOS month 1                                             | 1.09 (0.73, 1.64)                                 | 0.676              |
| CCOS month 2                                             | 1.02 (0.64, 1.62)                                 | 0.932              |
| CCOS month 3 and following                               | 1.03 (0.90, 1.19)                                 | 0.649              |

<sup>a</sup>P-value for overall effect of CCOS. CI, confidence interval; CPR, cardiopulmonary resuscitation; ICNARC, Intensive Care National Audit & Research Centre; ICU, intensive care unit; SD, standard deviation.

**Table S2 Effects of critical care outreach service (CCOS) activities on outcomes**

| Secondary exposure variable                     | Effect estimate (95% CI)<br>compared with no CCOS | P-value            |
|-------------------------------------------------|---------------------------------------------------|--------------------|
| <i>Model1a, Admission from ward</i>             |                                                   |                    |
|                                                 | <i>Odds ratio</i>                                 | 0.603 <sup>a</sup> |
| Ward follow-up                                  | 0.89 (0.75, 1.06)                                 | 0.190              |
| Outpatient follow-up                            | 1.12 (0.99, 1.28)                                 | 0.073              |
| Telephone advice                                | 1.01 (0.87, 1.18)                                 | 0.859              |
| Direct bedside clinical support                 | 0.97 (0.75, 1.25)                                 | 0.815              |
| Informal bedside teaching                       | 1.07 (0.84, 1.37)                                 | 0.563              |
| Formal educational courses                      | 0.96 (0.86, 1.07)                                 | 0.466              |
| Use of early warning/track & trigger            | 1.07 (0.93, 1.22)                                 | 0.338              |
| Audit & evaluation of outreach activity         | 1.04 (0.89, 1.21)                                 | 0.599              |
| <i>Model2a, CPR 24 hours prior to admission</i> |                                                   |                    |
|                                                 | <i>Odds ratio</i>                                 | 0.111 <sup>a</sup> |
| Ward follow-up                                  | 1.24 (0.97, 1.57)                                 | 0.081              |
| Outpatient follow-up                            | 1.00 (0.85, 1.19)                                 | 0.977              |
| Telephone advice                                | 0.99 (0.85, 1.15)                                 | 0.911              |
| Direct bedside clinical support                 | 0.90 (0.67, 1.21)                                 | 0.500              |
| Informal bedside teaching                       | 1.00 (0.65, 1.54)                                 | 0.994              |
| Formal educational courses                      | 0.89 (0.73, 1.07)                                 | 0.205              |
| Use of early warning/track & trigger            | 0.84 (0.72, 0.98)                                 | 0.029              |
| Audit & evaluation of outreach activity         | 0.92 (0.76, 1.10)                                 | 0.346              |
| <i>Model2b, Admission out-of-hours</i>          |                                                   |                    |
|                                                 | <i>Odds ratio</i>                                 | 0.152 <sup>a</sup> |
| Ward follow-up                                  | 0.97 (0.89, 1.07)                                 | 0.586              |
| Outpatient follow-up                            | 0.99 (0.92, 1.06)                                 | 0.734              |
| Telephone advice                                | 1.08 (1.01, 1.15)                                 | 0.017              |
| Direct bedside clinical support                 | 0.97 (0.88, 1.07)                                 | 0.565              |
| Informal bedside teaching                       | 1.05 (0.96, 1.15)                                 | 0.268              |
| Formal educational courses                      | 0.97 (0.90, 1.04)                                 | 0.363              |
| Use of early warning/track & trigger            | 1.01 (0.93, 1.10)                                 | 0.746              |
| Audit & evaluation of outreach activity         | 0.92 (0.82, 1.02)                                 | 0.096              |
| <i>Model2c, ICNARC physiology score</i>         |                                                   |                    |
|                                                 | <i>Change in mean</i>                             | 0.402 <sup>a</sup> |
| Ward follow-up                                  | 0.99 (-0.57, 2.55)                                | 0.213              |
| Outpatient follow-up                            | 0.33 (-0.67, 1.33)                                | 0.518              |
| Telephone advice                                | -0.13 (-1.04, 0.77)                               | 0.772              |
| Direct bedside clinical support                 | -1.00 (-3.29, 1.28)                               | 0.387              |
| Informal bedside teaching                       | 0.20 (-2.08, 2.48)                                | 0.863              |
| Formal educational courses                      | 0.10 (-0.96, 1.16)                                | 0.854              |
| Use of early warning/track & trigger            | -0.83 (-1.91, 0.25)                               | 0.130              |
| Audit & evaluation of outreach activity         | -0.13 (-1.28, 1.02)                               | 0.824              |
| <i>Model2c, ICNARC physiology score</i>         |                                                   |                    |
|                                                 | <i>Change in SD</i>                               | 0.098 <sup>a</sup> |
| Ward follow-up                                  | -0.042 (-0.093, 0.010)                            | 0.111              |
| Outpatient follow-up                            | -0.011 (-0.044, 0.023)                            | 0.536              |
| Telephone advice                                | 0.014 (-0.021, 0.048)                             | 0.442              |
| Direct bedside clinical support                 | 0.017 (-0.030, 0.063)                             | 0.487              |
| Informal bedside teaching                       | 0.037 (-0.022, 0.095)                             | 0.220              |
| Formal educational courses                      | 0.022 (-0.016, 0.059)                             | 0.261              |
| Use of early warning/track & trigger            | -0.058 (-0.103, -0.014)                           | 0.010              |
| Audit & evaluation of outreach activity         | 0.011 (-0.049, 0.071)                             | 0.716              |
| <i>Model2d, Active treatment withdrawn</i>      |                                                   |                    |
|                                                 | <i>Odds ratio</i>                                 | 0.006 <sup>a</sup> |
| Ward follow-up                                  | 1.04 (0.83, 1.31)                                 | 0.740              |
| Outpatient follow-up                            | 1.27 (1.09, 1.47)                                 | 0.002              |
| Telephone advice                                | 0.80 (0.67, 0.97)                                 | 0.021              |
| Direct bedside clinical support                 | 1.03 (0.79, 1.35)                                 | 0.815              |
| Informal bedside teaching                       | 0.92 (0.65, 1.31)                                 | 0.653              |
| Formal educational courses                      | 1.15 (0.93, 1.41)                                 | 0.201              |
| Use of early warning/track & trigger            | 0.86 (0.67, 1.11)                                 | 0.249              |
| Audit & evaluation of outreach activity         | 1.15 (0.89, 1.47)                                 | 0.281              |

|                                                          |                   |                    |
|----------------------------------------------------------|-------------------|--------------------|
| <i>Model2e, Mortality in ICU</i>                         | <i>Odds ratio</i> | 0.655 <sup>a</sup> |
| Ward follow-up                                           | 1.01 (0.89, 1.16) | 0.838              |
| Outpatient follow-up                                     | 0.92 (0.83, 1.01) | 0.087              |
| Telephone advice                                         | 0.96 (0.87, 1.06) | 0.448              |
| Direct bedside clinical support                          | 0.97 (0.85, 1.10) | 0.640              |
| Informal bedside teaching                                | 1.03 (0.90, 1.18) | 0.706              |
| Formal educational courses                               | 0.96 (0.86, 1.07) | 0.468              |
| Use of early warning/track & trigger                     | 0.99 (0.89, 1.11) | 0.905              |
| Audit & evaluation of outreach activity                  | 1.01 (0.88, 1.16) | 0.855              |
| <i>Model3a, Discharge out-of-hours</i>                   | <i>Odds ratio</i> | 0.027 <sup>a</sup> |
| Ward follow-up                                           | 0.95 (0.76, 1.20) | 0.688              |
| Outpatient follow-up                                     | 1.10 (0.92, 1.31) | 0.309              |
| Telephone advice                                         | 1.13 (0.95, 1.35) | 0.160              |
| Direct bedside clinical support                          | 0.72 (0.55, 0.94) | 0.014              |
| Informal bedside teaching                                | 1.23 (0.99, 1.52) | 0.061              |
| Formal educational courses                               | 1.00 (0.83, 1.20) | 0.994              |
| Use of early warning/track & trigger                     | 1.02 (0.72, 1.44) | 0.906              |
| Audit & evaluation of outreach activity                  | 1.23 (1.01, 1.50) | 0.038              |
| <i>Model3b, Early discharge due to shortage of beds</i>  | <i>Odds ratio</i> | 0.710 <sup>a</sup> |
| Ward follow-up                                           | 0.91 (0.63, 1.30) | 0.598              |
| Outpatient follow-up                                     | 0.88 (0.66, 1.17) | 0.380              |
| Telephone advice                                         | 1.04 (0.79, 1.36) | 0.785              |
| Direct bedside clinical support                          | 1.05 (0.70, 1.57) | 0.805              |
| Informal bedside teaching                                | 0.97 (0.71, 1.33) | 0.870              |
| Formal educational courses                               | 0.95 (0.73, 1.26) | 0.740              |
| Use of early warning/track & trigger                     | 1.29 (0.93, 1.80) | 0.132              |
| Audit & evaluation of outreach activity                  | 0.84 (0.56, 1.26) | 0.391              |
| <i>Model3c, Hospital deaths</i>                          | <i>Odds ratio</i> | 0.114 <sup>a</sup> |
| Ward follow-up                                           | 0.98 (0.82, 1.18) | 0.862              |
| Outpatient follow-up                                     | 0.94 (0.85, 1.03) | 0.193              |
| Telephone advice                                         | 1.09 (0.96, 1.23) | 0.169              |
| Direct bedside clinical support                          | 0.79 (0.64, 0.96) | 0.020              |
| Informal bedside teaching                                | 1.15 (1.01, 1.32) | 0.037              |
| Formal educational courses                               | 1.03 (0.94, 1.12) | 0.530              |
| Use of early warning/track & trigger                     | 1.05 (0.94, 1.16) | 0.409              |
| Audit & evaluation of outreach activity                  | 1.07 (0.92, 1.23) | 0.381              |
| <i>Model3d, Readmission within 48 hours of discharge</i> | <i>Odds ratio</i> | 0.411 <sup>a</sup> |
| Ward follow-up                                           | 1.00 (0.80, 1.25) | 0.972              |
| Outpatient follow-up                                     | 0.98 (0.86, 1.11) | 0.739              |
| Telephone advice                                         | 1.01 (0.84, 1.21) | 0.904              |
| Direct bedside clinical support                          | 0.97 (0.76, 1.23) | 0.781              |
| Informal bedside teaching                                | 1.17 (0.96, 1.42) | 0.123              |
| Formal educational courses                               | 1.00 (0.86, 1.15) | 0.950              |
| Use of early warning/track & trigger                     | 0.88 (0.70, 1.09) | 0.247              |
| Audit & evaluation of outreach activity                  | 1.08 (0.83, 1.40) | 0.564              |

<sup>a</sup>P-value for overall effect of CCOS activities. CI, confidence interval; CPR, cardiopulmonary resuscitation; ICNARC, Intensive Care National Audit & Research Centre; ICU, intensive care unit; SD, standard deviation.

**Table S3 Effects of the coverage of critical care outreach services (CCOS) on outcomes**

| Secondary exposure variable                     | Effect estimate (95% CI) compared with no CCOS | P-value                                |
|-------------------------------------------------|------------------------------------------------|----------------------------------------|
| <i>Model1a, Admission from ward</i>             |                                                |                                        |
|                                                 | <i>Odds ratio</i>                              | 0.438 <sup>a</sup> /0.330 <sup>b</sup> |
| 24 hours 7 days a week, 100% ward coverage      | 0.93 (0.77, 1.12)                              | 0.423                                  |
| 12-23 hours 7 days, 100% ward coverage          | 1.20 (0.87, 1.65)                              | 0.260                                  |
| < 12 hours 7 days, 100% ward coverage           | 0.95 (0.79, 1.13)                              | 0.549                                  |
| Selected days, 100% ward coverage               | 0.88 (0.76, 1.01)                              | 0.068                                  |
| 24 hours 7 days, <100% ward coverage            | 0.93 (0.75, 1.15)                              | 0.496                                  |
| 12-23 hours 7 days, <100% ward coverage         | 1.20 (0.87, 1.67)                              | 0.272                                  |
| < 12 hours 7 days, <100% ward coverage          | 0.95 (0.80, 1.13)                              | 0.556                                  |
| Selected days, <100% ward coverage              | 0.88 (0.76, 1.02)                              | 0.092                                  |
| <i>Model2a, CPR 24 hours prior to admission</i> |                                                |                                        |
|                                                 | <i>Odds ratio</i>                              | 0.215 <sup>a</sup> /0.015 <sup>b</sup> |
| 24 hours 7 days a week, 100% ward coverage      | 0.67 (0.50, 0.89)                              | 0.005                                  |
| 12-23 hours 7 days, 100% ward coverage          | 0.96 (0.66, 1.40)                              | 0.838                                  |
| < 12 hours 7 days, 100% ward coverage           | 0.84 (0.68, 1.04)                              | 0.105                                  |
| Selected days, 100% ward coverage               | 0.76 (0.63, 0.91)                              | 0.004                                  |
| 24 hours 7 days, <100% ward coverage            | 0.80 (0.61, 1.05)                              | 0.103                                  |
| 12-23 hours 7 days, <100% ward coverage         | 1.15 (0.75, 1.74)                              | 0.526                                  |
| < 12 hours 7 days, <100% ward coverage          | 1.00 (0.80, 1.25)                              | 0.979                                  |
| Selected days, <100% ward coverage              | 0.90 (0.73, 1.11)                              | 0.329                                  |
| <i>Model2b, Admission out-of-hours</i>          |                                                |                                        |
|                                                 | <i>Odds ratio</i>                              | 0.456 <sup>a</sup> /0.085 <sup>b</sup> |
| 24 hours 7 days a week, 100% ward coverage      | 0.95 (0.87, 1.03)                              | 0.220                                  |
| 12-23 hours 7 days, 100% ward coverage          | 0.97 (0.85, 1.10)                              | 0.581                                  |
| < 12 hours 7 days, 100% ward coverage           | 0.90 (0.81, 1.00)                              | 0.055                                  |
| Selected days, 100% ward coverage               | 0.89 (0.79, 1.00)                              | 0.045                                  |
| 24 hours 7 days, <100% ward coverage            | 0.93 (0.83, 1.03)                              | 0.171                                  |
| 12-23 hours 7 days, <100% ward coverage         | 0.94 (0.81, 1.10)                              | 0.455                                  |
| < 12 hours 7 days, <100% ward coverage          | 0.88 (0.80, 0.98)                              | 0.015                                  |
| Selected days, <100% ward coverage              | 0.87 (0.77, 0.97)                              | 0.016                                  |
| <i>Model2c, ICNARC physiology score</i>         |                                                |                                        |
|                                                 | <i>Change in mean</i>                          | 0.013 <sup>a</sup> /0.001 <sup>b</sup> |
| 24 hours 7 days a week, 100% ward coverage      | -1.49 (-3.12, 0.14)                            | 0.072                                  |
| 12-23 hours 7 days, 100% ward coverage          | 0.38 (-1.17, 1.94)                             | 0.629                                  |
| < 12 hours 7 days, 100% ward coverage           | -1.19 (-2.42, 0.04)                            | 0.058                                  |
| Selected days, 100% ward coverage               | -2.51 (-3.72, -1.30)                           | < 0.001                                |
| 24 hours 7 days, <100% ward coverage            | -0.43 (-2.12, 1.26)                            | 0.621                                  |
| 12-23 hours 7 days, <100% ward coverage         | 1.45 (-0.40, 3.29)                             | 0.124                                  |
| < 12 hours 7 days, <100% ward coverage          | -0.12 (-1.62, 1.38)                            | 0.872                                  |
| Selected days, <100% ward coverage              | -1.44 (-2.62, -0.27)                           | 0.016                                  |
| <i>Model2c, SD of ICNARC physiology score</i>   |                                                |                                        |
|                                                 | <i>Change in SD</i>                            | 0.434 <sup>a</sup> /0.565 <sup>b</sup> |
| 24 hours 7 days a week, 100% ward coverage      | -0.036 (-0.101, 0.030)                         | 0.285                                  |
| 12-23 hours 7 days, 100% ward coverage          | -0.006 (-0.074, 0.062)                         | 0.865                                  |
| < 12 hours 7 days, 100% ward coverage           | -0.034 (-0.089, 0.021)                         | 0.221                                  |
| Selected days, 100% ward coverage               | -0.004 (-0.061, 0.052)                         | 0.882                                  |
| 24 hours 7 days, <100% ward coverage            | -0.004 (-0.078, 0.070)                         | 0.917                                  |
| 12-23 hours 7 days, <100% ward coverage         | 0.026 (-0.057, 0.108)                          | 0.540                                  |
| < 12 hours 7 days, <100% ward coverage          | -0.003 (-0.068, 0.063)                         | 0.939                                  |
| Selected days, <100% ward coverage              | 0.027 (-0.026, 0.080)                          | 0.310                                  |
| <i>Model2d, Active treatment withdrawn</i>      |                                                |                                        |
|                                                 | <i>Odds ratio</i>                              | 0.004 <sup>a</sup> /0.008 <sup>b</sup> |
| 24 hours 7 days a week, 100% ward coverage      | 1.10 (0.84, 1.46)                              | 0.479                                  |
| 12-23 hours 7 days, 100% ward coverage          | 1.52 (1.13, 2.05)                              | 0.006                                  |
| < 12 hours 7 days, 100% ward coverage           | 1.12 (0.88, 1.42)                              | 0.373                                  |
| Selected days, 100% ward coverage               | 0.79 (0.61, 1.03)                              | 0.083                                  |
| 24 hours 7 days, <100% ward coverage            | 1.00 (0.76, 1.31)                              | 0.985                                  |
| 12-23 hours 7 days, <100% ward coverage         | 1.37 (0.94, 2.01)                              | 0.102                                  |
| < 12 hours 7 days, <100% ward coverage          | 1.01 (0.75, 1.35)                              | 0.956                                  |
| Selected days, <100% ward coverage              | 0.72 (0.53, 0.96)                              | 0.027                                  |

|                                                          |                   |                                         |
|----------------------------------------------------------|-------------------|-----------------------------------------|
| <i>Model2e, Mortality in ICU</i>                         | <i>Odds ratio</i> | 0.860 <sup>a</sup> / 0.924 <sup>b</sup> |
| 24 hours 7 days a week, 100% ward coverage               | 0.98 (0.83, 1.16) | 0.805                                   |
| 12-23 hours 7 days, 100% ward coverage                   | 0.98 (0.86, 1.12) | 0.821                                   |
| < 12 hours 7 days, 100% ward coverage                    | 1.04 (0.88, 1.22) | 0.653                                   |
| Selected days, 100% ward coverage                        | 0.93 (0.79, 1.10) | 0.401                                   |
| 24 hours 7 days, <100% ward coverage                     | 0.99 (0.82, 1.18) | 0.873                                   |
| 12-23 hours 7 days, <100% ward coverage                  | 0.99 (0.82, 1.20) | 0.927                                   |
| < 12 hours 7 days, <100% ward coverage                   | 1.04 (0.88, 1.24) | 0.631                                   |
| Selected days, <100% ward coverage                       | 0.94 (0.79, 1.12) | 0.466                                   |
| <i>Model3a, Discharge out-of-hours</i>                   | <i>Odds ratio</i> | 0.683 <sup>a</sup> / 0.733 <sup>b</sup> |
| 24 hours 7 days a week, 100% ward coverage               | 1.05 (0.85, 1.29) | 0.640                                   |
| 12-23 hours 7 days, 100% ward coverage                   | 1.42 (0.86, 2.37) | 0.174                                   |
| < 12 hours 7 days, 100% ward coverage                    | 0.98 (0.77, 1.23) | 0.840                                   |
| Selected days, 100% ward coverage                        | 1.09 (0.87, 1.36) | 0.466                                   |
| 24 hours 7 days, <100% ward coverage                     | 1.03 (0.81, 1.29) | 0.824                                   |
| 12-23 hours 7 days, <100% ward coverage                  | 1.39 (0.82, 2.36) | 0.222                                   |
| < 12 hours 7 days, <100% ward coverage                   | 0.95 (0.71, 1.28) | 0.751                                   |
| Selected days, <100% ward coverage                       | 1.06 (0.86, 1.31) | 0.572                                   |
| <i>Model3b, Early discharge due to shortage of beds</i>  | <i>Odds ratio</i> | 0.037 <sup>a</sup> / 0.066 <sup>b</sup> |
| 24 hours 7 days a week, 100% ward coverage               | 0.58 (0.27, 1.24) | 0.159                                   |
| 12-23 hours 7 days, 100% ward coverage                   | 0.63 (0.37, 1.09) | 0.099                                   |
| < 12 hours 7 days, 100% ward coverage                    | 0.77 (0.54, 1.11) | 0.164                                   |
| Selected days, 100% ward coverage                        | 1.22 (0.88, 1.68) | 0.236                                   |
| 24 hours 7 days, <100% ward coverage                     | 0.60 (0.30, 1.20) | 0.147                                   |
| 12-23 hours 7 days, <100% ward coverage                  | 0.65 (0.35, 1.19) | 0.163                                   |
| < 12 hours 7 days, <100% ward coverage                   | 0.80 (0.52, 1.22) | 0.295                                   |
| Selected days, <100% ward coverage                       | 1.25 (0.83, 1.88) | 0.278                                   |
| <i>Model3c, Hospital deaths</i>                          | <i>Odds ratio</i> | 0.089 <sup>a</sup> / 0.086 <sup>b</sup> |
| 24 hours 7 days a week, 100% ward coverage               | 1.09 (0.94, 1.28) | 0.259                                   |
| 12-23 hours 7 days, 100% ward coverage                   | 1.16 (1.04, 1.30) | 0.009                                   |
| < 12 hours 7 days, 100% ward coverage                    | 1.00 (0.87, 1.15) | 0.991                                   |
| Selected days, 100% ward coverage                        | 1.03 (0.92, 1.15) | 0.613                                   |
| 24 hours 7 days, <100% ward coverage                     | 1.10 (0.97, 1.26) | 0.131                                   |
| 12-23 hours 7 days, <100% ward coverage                  | 1.17 (1.02, 1.35) | 0.025                                   |
| < 12 hours 7 days, <100% ward coverage                   | 1.01 (0.90, 1.14) | 0.872                                   |
| Selected days, <100% ward coverage                       | 1.04 (0.94, 1.15) | 0.434                                   |
| <i>Model3d, Readmission within 48 hours of discharge</i> | <i>Odds ratio</i> | 0.257 <sup>a</sup> / 0.341 <sup>b</sup> |
| 24 hours 7 days a week, 100% ward coverage               | 1.02 (0.74, 1.40) | 0.927                                   |
| 12-23 hours 7 days, 100% ward coverage                   | 1.13 (0.95, 1.34) | 0.154                                   |
| < 12 hours 7 days, 100% ward coverage                    | 0.93 (0.78, 1.11) | 0.411                                   |
| Selected days, 100% ward coverage                        | 1.10 (0.92, 1.31) | 0.305                                   |
| 24 hours 7 days, <100% ward coverage                     | 0.99 (0.72, 1.36) | 0.941                                   |
| 12-23 hours 7 days, <100% ward coverage                  | 1.10 (0.89, 1.37) | 0.378                                   |
| < 12 hours 7 days, <100% ward coverage                   | 0.90 (0.75, 1.10) | 0.306                                   |
| Selected days, <100% ward coverage                       | 1.07 (0.88, 1.30) | 0.507                                   |

<sup>a</sup>P-value for difference among the secondary exposure categories. <sup>b</sup>P-value for overall effect of CCOS. CI, confidence interval; CPR, cardiopulmonary resuscitation; ICNARC, Intensive Care National Audit & Research Centre; ICU, intensive care unit; SD, standard deviation.

**Table S4 Effects of the staffing of critical care outreach services (CCOS) on outcomes**

| Secondary exposure variable                              | Effect estimate (95% CI)<br>compared with no CCOS | P-value                                |
|----------------------------------------------------------|---------------------------------------------------|----------------------------------------|
| <i>Model1a, Admission from ward</i>                      | <i>Odds ratio</i>                                 | 0.079 <sup>a</sup> /0.070 <sup>b</sup> |
| Medical team                                             | 1.07 (0.88, 1.30)                                 | 0.500                                  |
| Large team                                               | 1.18 (1.02, 1.35)                                 | 0.025                                  |
| <i>Model2a, CPR 24 hours prior to admission</i>          | <i>Odds ratio</i>                                 | 0.374 <sup>a</sup> /0.029 <sup>b</sup> |
| Medical team                                             | 0.87 (0.71, 1.08)                                 | 0.222                                  |
| Large team                                               | 0.93 (0.77, 1.13)                                 | 0.485                                  |
| <i>Model2b, Admission out-of-hours</i>                   | <i>Odds ratio</i>                                 | 0.090 <sup>a</sup> /0.003 <sup>b</sup> |
| Medical team                                             | 0.92 (0.84, 1.00)                                 | 0.046                                  |
| Large team                                               | 0.99 (0.91, 1.07)                                 | 0.809                                  |
| <i>Model2c, ICNARC physiology score</i>                  | <i>Change in mean</i>                             | 1.000 <sup>a</sup> /0.054 <sup>b</sup> |
| Medical team                                             | 0.02 (-1.36, 1.40)                                | 0.978                                  |
| Large team                                               | 0.01 (-1.12, 1.14)                                | 0.988                                  |
| <i>Model2c, ICNARC physiology score</i>                  | <i>Change in SD</i>                               | 0.360 <sup>a</sup> /0.502 <sup>b</sup> |
| Medical team                                             | -0.006 (-0.072, 0.060)                            | 0.862                                  |
| Large team                                               | -0.033 (-0.079, 0.013)                            | 0.157                                  |
| <i>Model2d, Active treatment withdrawn</i>               | <i>Odds ratio</i>                                 | 0.006 <sup>a</sup> /0.015 <sup>b</sup> |
| Medical team                                             | 0.76 (0.59, 0.97)                                 | 0.026                                  |
| Large team                                               | 1.29 (1.02, 1.64)                                 | 0.033                                  |
| <i>Model2e, Mortality in ICU</i>                         | <i>Odds ratio</i>                                 | 0.276 <sup>a</sup> /0.390 <sup>b</sup> |
| Medical team                                             | 0.91 (0.81, 1.03)                                 | 0.123                                  |
| Large team                                               | 0.99 (0.88, 1.10)                                 | 0.812                                  |
| <i>Model3a, Discharge out-of-hours</i>                   | <i>Odds ratio</i>                                 | 0.297 <sup>a</sup> /0.342 <sup>b</sup> |
| Medical team                                             | 0.84 (0.65, 1.09)                                 | 0.192                                  |
| Large team                                               | 1.02 (0.76, 1.36)                                 | 0.909                                  |
| <i>Model3b, Early discharge due to shortage of beds</i>  | <i>Odds ratio</i>                                 | 0.153 <sup>a</sup> /0.249 <sup>b</sup> |
| Medical team                                             | 0.84 (0.55, 1.27)                                 | 0.404                                  |
| Large team                                               | 0.78 (0.54, 1.12)                                 | 0.177                                  |
| <i>Model3c, Hospital deaths</i>                          | <i>Odds ratio</i>                                 | 0.062 <sup>a</sup> /0.051 <sup>b</sup> |
| Medical team                                             | 1.01 (0.93, 1.10)                                 | 0.801                                  |
| Large team                                               | 1.11 (1.02, 1.21)                                 | 0.020                                  |
| <i>Model3d, Readmission within 48 hours of discharge</i> | <i>Odds ratio</i>                                 | 0.634 <sup>a</sup> /0.750 <sup>b</sup> |
| Medical team                                             | 1.06 (0.87, 1.30)                                 | 0.535                                  |
| Large team                                               | 1.05 (0.89, 1.24)                                 | 0.587                                  |

<sup>a</sup>P-value for difference among the secondary exposure categories. <sup>b</sup>P-value for overall effect of CCOS. CI, confidence interval; CPR, cardiopulmonary resuscitation; ICNARC, Intensive Care National Audit & Research Centre; ICU, intensive care unit; SD, standard deviation.

**Table S5 Results of sensitivity analyses**

| <b>Primary exposure variable</b>                            | <b>Effect estimate (95% CI)<br/>compared with no CCOS</b> | <b>P-value</b>     |
|-------------------------------------------------------------|-----------------------------------------------------------|--------------------|
| <i>Model2a, CPR 24 hours prior to admission<sup>b</sup></i> | <i>Odds ratio</i>                                         | 0.086 <sup>a</sup> |
| CCOS month 1                                                | 0.81 (0.51, 1.29)                                         | 0.371              |
| CCOS month 2                                                | 0.92 (0.57, 1.49)                                         | 0.736              |
| CCOS month 3 and following                                  | 0.82 (0.70, 0.96)                                         | 0.015              |
| <i>Model2d, Active treatment withdrawn<sup>c</sup></i>      | <i>Odds ratio</i>                                         | 0.965 <sup>a</sup> |
| CCOS month 1                                                | 0.92 (0.55, 1.52)                                         | 0.740              |
| CCOS month 2                                                | 0.92 (0.62, 1.38)                                         | 0.695              |
| CCOS month 3 and following                                  | 0.97 (0.77, 1.22)                                         | 0.782              |

<sup>a</sup>P-value for overall effect of CCOS. <sup>b</sup>Restricted to admissions in hospital for at least 24 hours prior to ICU admission. <sup>c</sup>Restricted to active treatment withdrawal occurring within 48 hours of ICU admission. CCOS, critical care outreach service; CI, confidence interval; CPR, cardiopulmonary resuscitation; ICU, intensive care unit.
